# Supplementary material for: The development of CHAMP: a checklist for the appraisal of moderators and predictors
Source: Springer Nature journal article supplement (doi:10.1186/s12874-017-0451-0), 2017-12-01
Supplement: MOESM3 [file 15327226]

|                                                 | <b>CHAMP</b>                                                                        | <b>SATIRE checklist [10] /<br/>SUN 2010 [19]</b>                                                                                                                      | <b>Pincus [12]</b>                                                                                 |
|-------------------------------------------------|-------------------------------------------------------------------------------------|-----------------------------------------------------------------------------------------------------------------------------------------------------------------------|----------------------------------------------------------------------------------------------------|
| <i>Aim of tool</i>                              | to assess individual studies or body of evidence on moderator or predictor findings | to assess subgroup quality as part of a systematic review                                                                                                             | to assess moderator findings for inclusion in systematic reviews                                   |
| <i>Aimed at (M)oderators or (P)redictors</i>    | M and P                                                                             | M and P (referred to as 'subgroup effects')                                                                                                                           | M only                                                                                             |
| <i>Development method</i>                       | new checklist                                                                       | extension of existing set of 7 criteria by Oxman and Guyatt [23]                                                                                                      | new checklist                                                                                      |
| <i>Source of criteria</i>                       | literature & Delphi panel                                                           | existing checklist & expert opinion                                                                                                                                   | literature & Delphi panel                                                                          |
| <i>Target study types</i>                       | Quantitative or quantitative studies                                                | randomized trials (for inclusion in systematic reviews)                                                                                                               | randomized trials (for inclusion in systematic reviews)                                            |
| <i>Type of questions</i>                        | closed (polar)                                                                      | open (polar)                                                                                                                                                          | open (polar)                                                                                       |
| <i>Remarks</i>                                  | contains two lists:<br>1 for rating individual studies<br>1 for body of evidence    | SATIRE checklist: Not presented as standalone checklist; developed for their review specifically.<br>Sun 2010: similar to SATIRE checklist but presented as checklist | contains two lists:<br>1 for exploratory meta-analyses<br>1 for confirmatory meta-analyses         |
| <i>Primary output</i>                           | overall verdict and answers to individual items                                     | unspecified; answers to individual questions                                                                                                                          | unspecified; answers to individual questions                                                       |
| <i>Background information on item usage</i>     | included                                                                            | included for n=4 new items (Sun 2010 only). Remainder only through references                                                                                         | Included in publication, backup up by references but limited in usability as a standalone document |
| <i>Total number of items</i>                    | 13 (individual studies)<br>15 (body of evidence)                                    | 11                                                                                                                                                                    | 3 (exploratory)<br>5 (confirmatory)                                                                |
| <i>Prespecification of hypothesis</i>           | yes                                                                                 | yes (also directional)                                                                                                                                                | yes (only in confirmatory list)                                                                    |
| <i>Prespecification of analysis</i>             | yes                                                                                 | no                                                                                                                                                                    | yes (only in confirmatory list)                                                                    |
| <i>Interaction test usage</i>                   | yes                                                                                 | yes                                                                                                                                                                   | yes                                                                                                |
| <i>Credibility of findings</i>                  | (indirect through biol. Rationale and effect size)                                  | (indirect through biol. rationale)                                                                                                                                    | yes (only in confirmatory list, theory or evidence-based plausibility)                             |
| <i>Consistency (within and between studies)</i> | yes (between studies only in body-of-evidence list)                                 | yes                                                                                                                                                                   | no                                                                                                 |
| <i>Transferability of findings</i>              | yes                                                                                 | no                                                                                                                                                                    | no                                                                                                 |
| <i>Was factor measured at</i>                   | yes                                                                                 | yes (only refers to randomisation)                                                                                                                                    | yes (only refers to randomisation)                                                                 |

|                                             |                           |                           |                                 |
|---------------------------------------------|---------------------------|---------------------------|---------------------------------|
| <i>baseline or before randomisation</i>     |                           |                           |                                 |
| <i>Biological rationale</i>                 | yes                       | yes ('indirect evidence') | yes (only in confirmatory list) |
| <i>Independence other effects</i>           | no                        | yes                       | no                              |
| <i>Effect within versus between studies</i> | no                        | yes                       | no                              |
| <i>Limited to a small number of tests</i>   | yes                       | yes                       | no                              |
| <i>Effect size</i>                          | yes (clinical importance) | yes                       | no                              |
| <i>Measurement quality</i>                  | yes                       | no                        | yes                             |
| <i>Sample size</i>                          | yes                       | no                        | no                              |
| <i>Completeness of tests reported</i>       | yes                       | no                        | no                              |
| <i>Statistical reporting</i>                | yes                       | no                        | no                              |

*Table 1: comparison of CHAMP checklist (this study) with two checklists by Sun et al.[10, 19](both are similar, hence compared simultaneously) and a moderator checklist by Pincus et al. [12].*
