# Supplementary material for: The development of CHAMP: a checklist for the appraisal of moderators and predictors
Source: BMC Med Res Methodol. 2017 Dec 21;17:173. doi: 10.1186/s12874-017-0451-0 (PMC5740883; doi:10.1186/s12874-017-0451-0)
Supplement: Supplementary file 1 — Contains the history of the criteria contained in the checklist and their valuation and transformation throughout the entire study. (XLSX 26 kb) [file 12874_2017_451_MOESM1_ESM.xlsx]

## Sheet: Overview of items
	Literature review		First Delphi round and adjustments			Second Delphi round and adjustments		Pilot test version						Pre-final version			Final version
	Criterion	References (see below)	Results round 1 (mean, [IPR])	accepted*	Comments / changes	Results round 2 (mean, [IPR])	Included in test version*	Category	Revised item in test version	Inter-rater agreement*	Percentage use of 'don't know'	Percentage use of 'Not applicable'	Specific comments/adjustments*	Category	Item	Specific comments/adjustments
1	Identification of moderator variables
1.1	Was an interaction test used to test for a subgroup effect, and P-values for tests of interaction or heterogeneity reported?	1,7	7.77 [7.00; 9.00]	Yes	-	-	Yes (although partially changed due to overlap with 5.1)	Population and measurements	Was an interaction test used to test for a moderator effect?	0.17 [-0.26, 0.55]	0.05	0.1	Altered as it only applies to moderators, not predictors	Analysis	In case of a moderator, was an interaction test used?	-	5. In case of a moderator, was an interaction test used?
1.2	Is the subgroup variable a characteristic measured before randomization?	1,9,14	7.07 [6.00; 8.00]	Yes	Added 'If concerning a moderator that can change'	-	Yes	Population and measurements	Was the moderator variable measured before randomisation?	-0.14 [-0.52, 0.3]	0.02	0.62	Replaced 'randomisation' to 'allocation or start of the intervention' to increase applicability of the item	Design	Was the moderator or predictor variable measured before the allocation or start of the intervention?	-	3. Was the moderator or predictor variable measured before the allocation or start of the intervention?
1.3	Were continuous moderators without meaningful zero points centered?	4,8	4.83 [3.00; 6.70]	No (no agreement)	-	3.33 [1.00; 5.60]	No (agreed to be excluded)
2	Spurious results
2.1	Are all predictor or moderator variables examined reported?	3,5,6	7.71 [7.00; 8.10]	Yes	-	-	Yes	Results	Are all moderator and predictor variables examined reported?	-0.07 [-0.47, 0.36]	0.17	0.07	-	Results	Were results presented for all candidate moderators or predictors that were examined?	-	8. Were results presented for all candidate moderators or predictors that were examined?
2.2	Are subgroups and their analyses defined a priori?	11	7.29 [7.00; 8.00]	Yes	Added 'In the case of hypothesis-testing'	-	Yes	Study design	In the case of hypothesis-testing, are moderator hypotheses and their analyses defined a priori?	-0.06 [-0.46, 0.37]	0.05	0.33	Moved to background section of criterion 3.1
2.3	Are subgroup hypotheses defined a priori?	5,6,9,10,14,15	7.07 [7.00; 8.00]	Yes	Added 'In the case of hypothesis-testing'	-	No (overlapping with 2.2 after revisions)
2.5	The subgroup effect was one of a small number of hypothesized effects tested?	6,7,14,15	6.50 [5.00; 7.10]	Yes	Added 'In the case of hypothesis-testing'	-	Yes	Population and measurements	In the case of hypothesis-testing, are the moderator effects one of a small number of hypothesized effects tested?	0.19 [-0.25, 0.56]	0.07	0.38	Removed term 'hypothesized' to make the item also apply to non-hypothesized effects (e.g. exploratory research)	Analysis	Was a limited number of moderators and predictors tested?	-	6. Was a limited number of moderators and predictors tested?
2.4	Was the direction of the subgroup effect specified a priori?	14,15	5.43 [5.00; 6.10]	No (inconclusive)	-	5.67 [3.60; 7.00]	No (no agreement, inconclusive score, overlap 2.3)
3	Theoretical basis of variables
3.1	Was the selection of moderators to consider pre-specified?	1	7.50 [7.00; 8.00]	Yes	Added 'In the case of hypothesis-testing'	-	Yes	Study design	In the case of hypothesis-testing, was the selection of moderators to consider pre-specified?	0.17 [-0.26, 0.55]	0.05	0.29	-	Design	Was the moderator or predictor specified a priori?	-	2. Was the moderator or predictor specified a priori?
3.2	Was the selection of moderators to consider based on expert knowledge and theoretical considerations?	1	6.71 [6.00; 7.00]	Yes	theoretical considerations' -> 'evidence based'	-	Yes	Study design	Was the selection of moderators to consider based on expert knowledge and/or theoretical considerations?	0.54 [0.16, 0.78]	0.05	0	-	Design	A priori plausibility: was there sufficient empirical or theoretical support for the moderator or predictor that was examined?	-	1. A priori plausibility: was there sufficient empirical or theoretical support for the moderator or predictor that was examined?
3.3	Was distinction made between which moderators were defined a priori and which post hoc?	3	8.07 [7.00; 9.00]	Yes	-	-	Yes	Results	Was distinction made between which moderators were defined a priori and which post hoc?	0.07 [-0.36, 0.48]	0.07	0.33	Removed; Does not apply to single moderators or predictors and overlaps in those cases with 3.1
3.4	Is there (in)direct evidence that supports the hypothesized interaction (e.g. biological rationale)?	6,14,15	6.43 [6.90; 8.00]	Yes	-	-	Yes	Study design	Is there (in)direct evidence that supports the hypothesized interaction (e.g. biological rationale)?	0.16 [-0.28, 0.54]	0.02	0.05	Removed due to overlap with 3.2
3.5	Was measurement of baseline and process moderators/predictors reliable and valid (from published information) in target population?	1	7.00 [6.00; 8.00]	Yes	-	-	Yes	Population and measurements	Was measurement of baseline and process moderators/predictors reliable and valid (from published information) in target population?	0.32 [-0.12, 0.65]	0	0.12	-	Design	Was measurement of the moderator or predictor reliable and valid in the target population?	-	4. Was measurement of the moderator or predictor reliable and valid in the target population?
4	Sample size and analysis
4.1	Has power analysis been performed specifically to detect moderation effects?	3,4	4.86 [3.00; 6.10]	No (no agreement)	Added 'In the case of hypothesis-testing'	5.33 [3.60; 6.70]	Yes (although no agreement & inconclusive score)	Analysis	In the case of hypothesis-testing, has power-analysis been performed specifically to detect moderation effects?	0.34 [-0.09, 0.66]	0.02	0.4	Removed as the rationale of this item is covered by 2.1 (a priori planning) and 4.3 (adequate sample size)
4.2	Do authors report a power analysis for moderator effect (a-priori or posthoc, but using an a-priori effect size, not the observed one?)	1	4.79 [3.90; 6.10]	No	-	5.18 [3.00; 7.00]	No (no agreement, inconclusive score)
4.3	Was sample size adequate for the moderator analysis (at least 4 fold the required sample size for main treatment effect in the lowest sub-group for the moderator factor)?	1	5.00 [4.00; 6.00]	No	Removed 'at least 4 fold the required sample size for main treatment effect in the lowest sub-group for the moderator factor'	5.67 [5.30; 7.00]	Yes (though removed rule of thumb)	Results	Was sample size adequate for the moderator analysis?	0.29 [-0.14, 0.64]	0.26	0.1	-	Analysis	Was sample size adequate for the moderator or predictor analysis?	-	7. Was sample size adequate for the moderator or predictor analysis?
4.4	If sample size was less than 4 fold the required sample size for main treatment effect in the lowest sub-group for the moderator factor, were there at least 20 people in the smallest sub-group of the moderator?	1	5.31 [4.00; 7.00]	No	-	5.10 [4.00; 7.00]	No (inconclusive, but based solely on rules of thumb)
4.5	Did authors refrain from employing analysis to compensate for insufficient power (i.e. boot-strapping techniques?)	1	5.15 [4.60; 6.00]	No	-	3.83 [2.60; 5.00]	No
4.6	Was there an equal distribution of moderators between groups at baseline?	1	4.64 [2.00; 6.00]	No (no agreement)	-	4.17 [2.60; 5.70]	No
4.7	Was the regression significant at P < 0.05, or (if more than three comparisons) corrected or significance adjusted to P < 0.01 or using Bonferroni or similar corrections?	1,2,7	5.43 [4.80; 7.00]	No	Removed 'P < 0.05, or (if more than three comparisons) corrected or significance adjusted to P < 0.01 or using Bonferroni or similar correction'	6.11 [5.80; 7.00]	Yes (though removed p-value considerations)	Results	Was the moderator significant?	0.59 [0.24, 0.81]	0.02	0.1	Generalised item	Results	Did statistical tests or confidence intervals indicate that observed moderator or predictor effects were unlikely to be merely due to chance variation?	-	9. Did statistical tests or confidence intervals indicate that observed moderator or predictor effects were unlikely to be merely due to chance variation?
4.8	Did the authors explore residual variances of interactions if carrying out multiple two-way interactions?	1	5.80 [5.00; 6.00]	No	-	4.00 [4.40; 5.00]	No
4.9	Were all moderators analyzed in a single model?	2	5.00 [2.00; 6.00]	No (no agreement)	-	3.50 [1.70; 5.00]	No
5	Credibility of effect
5.1	Were effect sizes, confidence intervals and statistical significance reported for all subgroups?	3	7.57 [7.00; 9.00]	Yes		-	Yes	Results	Were effect sizes, confidence intervals and statistical significance reported?	0.36 [-0.06, 0.68]	0.02	0.02		Results	Were results on moderation or prediction of treatment outcome reported including confidence intervals or statistical significance?	Removed as item; contents moved to background section as it is more a reporting criterion, to help interpret clinical significancy. Plus, partially covered by item 9
5.2	Does the interaction test suggest a low likelihood that chance explains the apparent subgroup effect?	9,14,15	6.38 [5.60; 8.00]	Yes		-	Yes	Results	Does the interaction test suggest a low likelihood that chance explains the apparent moderator effect?	0.03 [-0.39, 0.44]	0.1	0.43	Removed after merging with 4.7 (after generalising 4.7 it also covers this item)
5.3	Is there evidence that the measurement error of the instrument is likely to be sufficiently small to detect the differences between subgroups that are likely to be important?	1	6.15 [6.00; 7.00]	Yes		-	Yes	Population and measurements	Is there evidence that the measurement error of the instrument is likely to be sufficiently small to detect the differences between subgroups that are likely to be important?	0.33 [-0.1, 0.66]	0.12	0.14	Removed due to overlap with 3.5
5.4	Is there an explicit presentation of the differences in outcome between baseline subgroups (e.g. standardized mean difference between groups, Cohen’s d)?	1	6.21 [5.90; 8.00]	Yes		-	Yes	Results	Is there an explicit presentation of the differences in outcome between baseline subgroups (e.g. standardized mean difference between groups, Cohen's d)?	0.29 [-0.14, 0.64]	0.05	0.33	Item simplified; details moved to background section	Results	Were differences in outcome between subgroups presented?	Removed as item; contents moved to background section as it is more a reporting criterion, to help interpret clinical significancy
5.5	Is the significant interaction effect independent of other potential subgroup effects?	9,14	5.50 [4.00; 7.00]	No		4.64 [2.00; 7.00]	No (no agreement, inconclusive score)
5.6	Is the interaction consistent across closed related outcomes within the study?	9,14	5.75 [6.00; 7.00]	No		6.67 [7.00; 7.00]	Yes	Results	Is the interaction consistent across closely related outcome measures within the study?	0.19 [-0.25, 0.56]	0.14	0.48	-	Results	Was the moderator or predictor effect consistent with related moderators or predictors, or across related outcomes measured within the study?	-	10. Was the moderator or predictor effect consistent with related moderators or predictors, or across related outcomes measured within the study?
5.7	Was there adjustment for other baseline factors?	1	5.57 [3.90; 7.10]	No		5.42 [3.20; 7.00]	No (no agreement, inconclusive score)
6	Applicability and relevance
6.1	Are the patients in the subgroup comparable to my patients?	11	6.42 [6.00; 7.70]	Yes	'Are the patients in the subgroup' -> 'Is the sampled population'	-	Yes	Population and measurements	Is the sampled population comparable to my patients?	-0.18 [-0.56, 0.26]	0.21	0.02	-	Transferability	Were the setting and study population comparable to the setting and population in which the information would be used?	-	11. Were the setting and study population comparable to the setting and population in which the information would be used?
6.2	Is the subgroup effect or interaction clinically important?	5,11	7.07 [7.00; 8.10]	Yes	Merged with 6.4 due to overlap content	-	No
6.3	Were the magnitude of the differences in reported subgroup analysis large enough to support different recommendations for the subgroups?	1	6.86 [6.90; 8.00]	Yes	Merged with 6.4 due to overlap content	-	No
6.4	Is the between-subgroup treatment effect clinically important?		5.23 [3.00; 7.40]	No (no agreement)	Added 'i.e., does it support making different clinical decisions for different patients in this population?'	6.58 [5.60; 9.00]	Yes	Results	Is the moderator effect clinically important, i.e., does it support making different clinical decisions for different patients in this population?	0.37 [-0.05, 0.68]	0.21	0	-	Transferability	Is the moderator or predictor effect clinically important?	-	12. Is the moderator or predictor effect clinically important?
6.5	Are there ethical issues involved in using the moderator to selecting patients for treatments?	-	5.46 [4.20; 7.00]	No (no agreement)		5.00 [2.30; 7.00]	No (no agreement, inconclusive score); merged with 6.4
7	Validity of meta-analysis and meta-regression
7.1	Is the effect suggested by comparisons within rather than between studies?	1,10,14,15	7.27 [7.00; 8.00]	Yes		-	Yes (though reworded based op comments)	Meta-analysis	Do within and between study comparisons agree with each other?	-	-	-	Not tested; adjustments based on reviews by experts and research team	Body of evidence	Was the moderator or predictor effect consistent with related moderators or predictors, or across related outcomes measured between the studies?	-	10. Was the moderator or predictor effect consistent with related moderators or predictors, or across related outcomes measured between the studies?
7.2	The review/investigative team included clinical experts or stated a plan for consulting clinical experts during the review protocol development and implementation	16	6.08 [4.60; 7.40]	Yes		-	Yes	Meta-analysis	Did the review/investigative team include clinical experts or have they stated a plan for consulting clinical experts during the review protocol development and implementation?	-	-	-	Not tested; adjustments based on reviews by experts and research team; Removed due to overlap with study validity/best practice of systematic reviewing
7.3	Were studies that did not include the moderator of interest excluded from the analysis?	2	6.67 [5.30; 7.70]	Yes		-	Yes	Meta-analysis	Were studies that did not include the moderator of interest excluded from the analysis?	-	-	-	Not tested; adjustments based on reviews by experts and research team; Removed due to overlap with study validity/best practice of systematic reviewing
7.4	Was a mixed model used to model the effect of moderators over studies?	2	6.44 [6.00; 7.60]	Yes	mixed model' generalised as 'did the model […] account for heterogeneity'	-	Yes	Meta-analysis	Did the model for evaluating the effects of moderators over studies account for between-study heterogeneity in (moderator) effects?	-	-	-	Not tested; adjustments based on reviews by experts and research team; Removed due to overlap with study validity/best practice of systematic reviewing
7.5	Did the reviewers state any plans to include additional covariates after looking at the data (post hoc) from included studies (e.g., forest plots, radial plots) and how they plan to do this?	16	6.38 [5.60; 7.00]	Yes		-	Yes	Meta-analysis	Did the reviewers state any plans to include additional covariates after looking at the data (pots hoc) from included studies (e.g., forest plots, radial plots) and how they plan to do this?	-	-	-	Not tested; adjustments based on reviews by experts and research team; Removed due to overlap with study validity/best practice of systematic reviewing
7.6	Was described a priori how the results of any findings were going to be interpreted and used in the overall synthesis of evidence?	16	6.29 [6.00; 7.00]	Yes		-	Yes	Meta-analysis	Was described a priori how the results of any findings were going to be interpreted and used in the overall synthesis of evidence?	-	-	-	Not tested; adjustments based on reviews by experts and research team; Removed due to overlap with study validity/best practice of systematic reviewing as well as item 3.1
7.7	If participant level covariates are investigated, was individual patient data used?	12,13,16	7.58 [7.00; 8.00]	Yes		-	Yes	Meta-analysis	If participant level covariates are investigated, was individual patient data used?	-	-	-	Not tested; adjustments based on reviews by experts and research team; Removed due to overlap with study validity/best practice of systematic reviewing
7.8	The exploration of potentially relevant variables was not inhibited by the absence of significant statistical tests for heterogeneity?	16	5.50 [5.00; 6.00]	No		5.50 [5.00; 6.00]	No (inconclusive score with much negative feedback)
7.9	Is the interaction consistent across studies?	9,14	6.67 [ 6.90; 8.00]	No	Although originally suggested as an additional item, the criterion was changed to address effect sizes rather than interactions	6.83 [7.00; 7.70]	Yes	Meta-analysis	Is the moderator effect size consistent across studies?	-	-	-	Not tested; adjustments based on reviews by experts and research team	Body of evidence	Was the moderator or predictor effect reasonable homogenous across studies?	-	13. Was the moderator or predictor effect reasonably homogenous across studies?
7.1	A logical hierarchy of clinical covariates was formed and investigated only if there is sufficient rationale and a sufficient number of trials available (10 trials per covariate)?	1	5.25 [5.00; 6.00]	No		4.67 [3.80; 6.00]	No (inconclusive score with negative feedback)
8	Items for body of evidence
8.1	Is the subgroup difference consistent across studies?	11.17	7.29 [7.00; 9.00]	No	'consistent' --> 'reasonably homogenous'	7.67 [7.00; 9.00]	Yes	Body of evidence	Is the moderator or predictor effect reasonably homogenous across studies ?	-	-	-	Not tested; adjustments based on reviews by experts and research team. Merged with 7.1
8.2	Is the (combined) subgroup effect or interaction clinically important?	1,5,11	7.21 [7.90; 8.00]	No	'(combined) subgroup effect' --> 'pooled study effect'; Added 'i.e. would the result influence clinical decision making'	7.36 [8.00; 9.00]	Yes	Body of evidence	Is the synthesized moderator or predictor effect clinically important (i.e. would the result influence clinical decision making)?	-	-	-	Not tested; no adjustments based on reviews by experts and research team	Body of evidence	Is the moderator or predictor effect clinically important?	-	12. Is the moderator or predictor effect clinically important?
8.3	Are the patients in the subgroup comparable to the target population?	11	6.91 [7.00; 8.00]	No	subgroup' --> 'sampled population'; 'the target population' --> 'the population for which the information will be used'	6.82 [8.00; 8.00]	Yes	Body of evidence	Are the patients in the sampled population comparable to the population for which the information will be used?	-	-	-	Not tested; no adjustments based on reviews by experts and research team	Body of evidence	Were the setting and study population comparable to the setting and population in which the information would be used?	-	11. Were the setting and study population comparable to the setting and population in which the information would be used?
8.4	Would the outcome influence my decision making?	3	6.25 [5.30; 7.70]	No	Would the outcome influence my decision making?	5.18 [3.00; 7.00]	No (no agreement; contents merged with 8.2)
8.5	Is the between-subgroup treatment effect clinically important?	1,5,11	5.85 [4.80; 7.40]	No	Is the moderator effect clinically important?	5.50 [2.90; 8.00]	No (no agreement, inconclusive score, overlap with 8.1)
8.6													Item suggested during review	Body of evidence	Was the moderator or predictor effect reasonably homogenous across studies?	Overlap with item 13, although the idea behind the item was not (i.e. ecological bias); Hence, item reworded to focus more on study properties	14. Was the moderator or predictor measured similarly across the included studies, or was an adequate conversion performed?
	Appraisal criteria retrieved from literature may have been reworded to fit answering model (e.g. by transforming statements into questions)		*A criterion is accepted for inclusion in the test-version of the appraisal tool if the mean appropriateness score >6 and agreement has been reached according to the IPRAS method.	Inclusion at this point based on IPRAS method only	A number of revisions were made to all criteria to make the reference to the effect (moderator, subgroup, predictor) more uniform; Revisions to improve readability of items not shown	*Items agreed to be included in round 1 were not re-evaluated							*Conditions such as 'in the case of hypothesis testing' were moved to the background section. Due to the addition of the background section, it was possible to merge many criteria. Many items were revised to make clear items refer to a single moderator/predictor only
	References
	1	PINCUS, T., MILES, C., FROUD, R., UNDERWOOD, M., CARNES, D., TAYLOR, S. 2011. Methodological criteria for the assessment of moderators in systematic reviews of randomised controlled trials: a consensus study. BMC Medical Research Methodology, 11, 14.
	2	VIECHTBAUER, W. 2008. Analysis of Moderator Effects in MetaAnalysis. In: OSBORNE, J. (ed.) Best practices in quantitative methods. Thousand oaks, CA: SAGE Publications, Inc., 471-488.
	3	GABLER, N. B., DUAN, N., LIAO, D., ELMORE, J. G., GANIATS, T. G., KRAVITZ, R. L. 2009. Dealing with heterogeneity of treatment effects: is the literature up to the challenge? Trials, 10, 43.
	4	WU, A. D., ZUMBO, B. D. 2008. Understanding and using mediators and moderators. Social Indicators Research, 87, 367-392.
	5	THOMPSON, S. G., HIGGINS, J. P. 2002. How should meta-regression analyses be undertaken and interpreted? Stat Med, 21, 1559-73.
	6	YUSUF, S., WITTES, J., PROBSTFIELD, J., TYROLER, H. A. 1991. Analysis and interpretation of treatment effects in subgroups of patients in randomized clinical trials. JAMA, 266, 93-8.
	7	ASSMANN, S. F., POCOCK, S. J., ENOS, L. E., KASTEN, L. E. 2000. Subgroup analysis and other (mis)uses of baseline data in clinical trials. Lancet, 355, 1064-9.
	8	KRAEMER, H. C., WILSON, G. T., FAIRBURN, C. G., AGRAS, W. S. 2002. Mediators and moderators of treatment effects in randomized clinical trials. Archives of General Psychiatry, 59, 877.
	9	SUN, X., BRIEL, M., BUSSE, J., AKL, E., YOU, J., MEJZA, F., BALA, M., DIAZ-GRANADOS, N., BASSLER, D., MERTZ, D., SRINATHAN, S., VANDVIK, P., MALAGA, G., ALSHURAFA, M., DAHM, P., ALONSO-COELLO, P., HEELS-ANSDELL, D., BHATNAGAR, N., JOHNSTON, B., WANG, L., WALTER, S., ALTMAN, D., GUYATT, G. 2009. Subgroup Analysis of Trials Is Rarely Easy (SATIRE): a study protocol for a systematic review to charac…
	10	GUYATT, G. H., OXMAN, A. D., KUNZ, R., WOODCOCK, J., BROZEK, J., HELFAND, M., ALONSO-COELLO, P., GLASZIOU, P., JAESCHKE, R., AKL, E. A., NORRIS, S., VIST, G., DAHM, P., SHUKLA, V. K., HIGGINS, J., FALCK-YTTER, Y., SCHUNEMANN, H. J., GROUP, G. W. 2011. GRADE guidelines: 7. Rating the quality of evidence--inconsistency. J Clin Epidemiol, 64, 1294-302.
	11	DIJKMAN, B., KOOISTRA, B., BHANDARI, M., EVIDENCE-BASED SURGERY WORKING, G. 2009. How to work with a subgroup analysis. Can J Surg, 52, 515-22.
	12	GROENWOLD, R. H., DONDERS, A. T., VAN DER HEIJDEN, G. G., HOES, A. W., ROVERS, M. M. 2009. COnfounding of subgroup analyses in randomized data. Archives of Internal Medicine, 169, 1532-1534.
	13	BIGGER, J. T. 2003. Issues in Subgroup Analyses and Meta-Analyses of Clinical Trials. Journal of cardiovascular electrophysiology, 14, S6-S8.
	14	SUN, X., BRIEL, M., WALTER, S. D., GUYATT, G. H. 2010. Is a subgroup effect believable? Updating criteria to evaluate the credibility of subgroup analyses. BMJ, 340.
	15	OXMAN, A. D., GUYATT, G. H. 1992. A consumer's guide to subgroup analyses. Ann Intern Med, 116, 78-84.
	16	GAGNIER, J. J., MOHER, D., BOON, H., BEYENE, J., BOMBARDIER, C. 2012. Investigating clinical heterogeneity in systematic reviews: a methodologic review of guidance in the literature. BMC Med Res Methodol, 12, 111.
